# Supplementary material for: Chlorine-containing polyacetoxybriarane diterpenoids from the octocoral Junceella fragilis
Source: Royal Society of Chemistry journal article supplement (doi:10.1039/d4ra03062a), 2024-01-01
Supplement: d4ra03062a1.pdf [file d4ra03062a1.pdf]

Supporting information

|                                                                                                   |    |
|---------------------------------------------------------------------------------------------------|----|
| S1. HRESIMS spectrum of compound <b>4</b> .....                                                   | 2  |
| S2. IR spectrum of compound <b>4</b> .....                                                        | 2  |
| S3. <sup>1</sup> H NMR spectrum (600 MHz) of compound <b>4</b> in CDCl <sub>3</sub> .....         | 3  |
| S4. <sup>13</sup> C NMR spectrum (600 MHz) of compound <b>4</b> in CDCl <sub>3</sub> .....        | 3  |
| S5. HSQC spectrum of compound <b>4</b> in CDCl <sub>3</sub> .....                                 | 4  |
| S6. HMBC spectrum of compound <b>4</b> in CDCl <sub>3</sub> .....                                 | 5  |
| S7. <sup>1</sup> H- <sup>1</sup> H COSY spectrum of compound <b>4</b> in CDCl <sub>3</sub> .....  | 6  |
| S8. NOESY spectrum of compound <b>4</b> in CDCl <sub>3</sub> .....                                | 7  |
| S9. HRESIMS spectrum of compound <b>5</b> .....                                                   | 8  |
| S10. IR spectrum of compound <b>5</b> .....                                                       | 8  |
| S11. <sup>1</sup> H NMR spectrum (600 MHz) of compound <b>5</b> in CDCl <sub>3</sub> .....        | 9  |
| S12. <sup>13</sup> C NMR spectrum (600 MHz) of compound <b>5</b> in CDCl <sub>3</sub> .....       | 10 |
| S13. HSQC spectrum of compound <b>5</b> in CDCl <sub>3</sub> .....                                | 11 |
| S14. HMBC spectrum of compound <b>5</b> in CDCl <sub>3</sub> .....                                | 12 |
| S15. <sup>1</sup> H- <sup>1</sup> H COSY spectrum of compound <b>5</b> in CDCl <sub>3</sub> ..... | 13 |
| S16. NOESY spectrum of compound <b>5</b> in CDCl <sub>3</sub> .....                               | 14 |
| S17. Single-crystal X-ray Crystallography of compound <b>1</b> .....                              | 15 |
| S18. Single-crystal X-ray Crystallography of compound <b>2</b> .....                              | 26 |

NJ-6-4-5-3-2-2-5-5\_20231205124606 #17 RT: 0.12 AV: 1 NL: 7.58E5  
T: FTMS + p ESI sid=35.00 Full ms [100.0000-1000.0000]

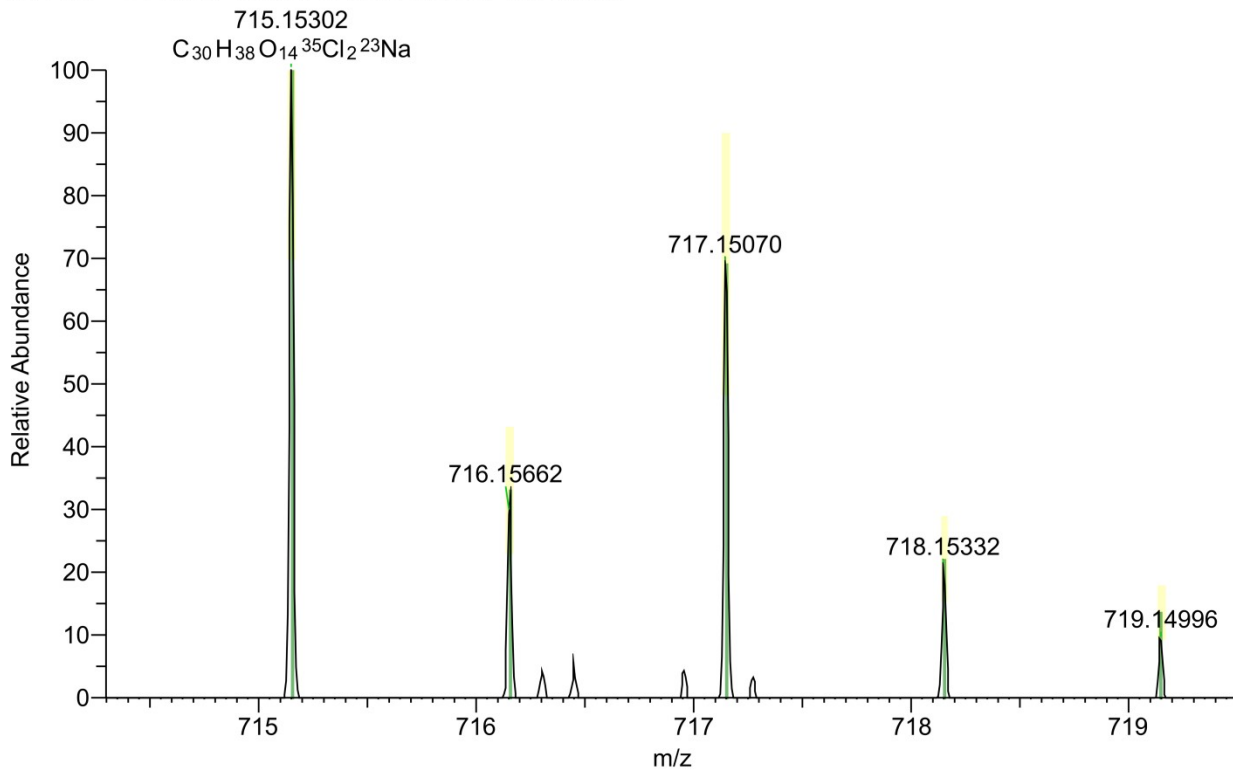

S1. HRESIMS spectrum of compound 4

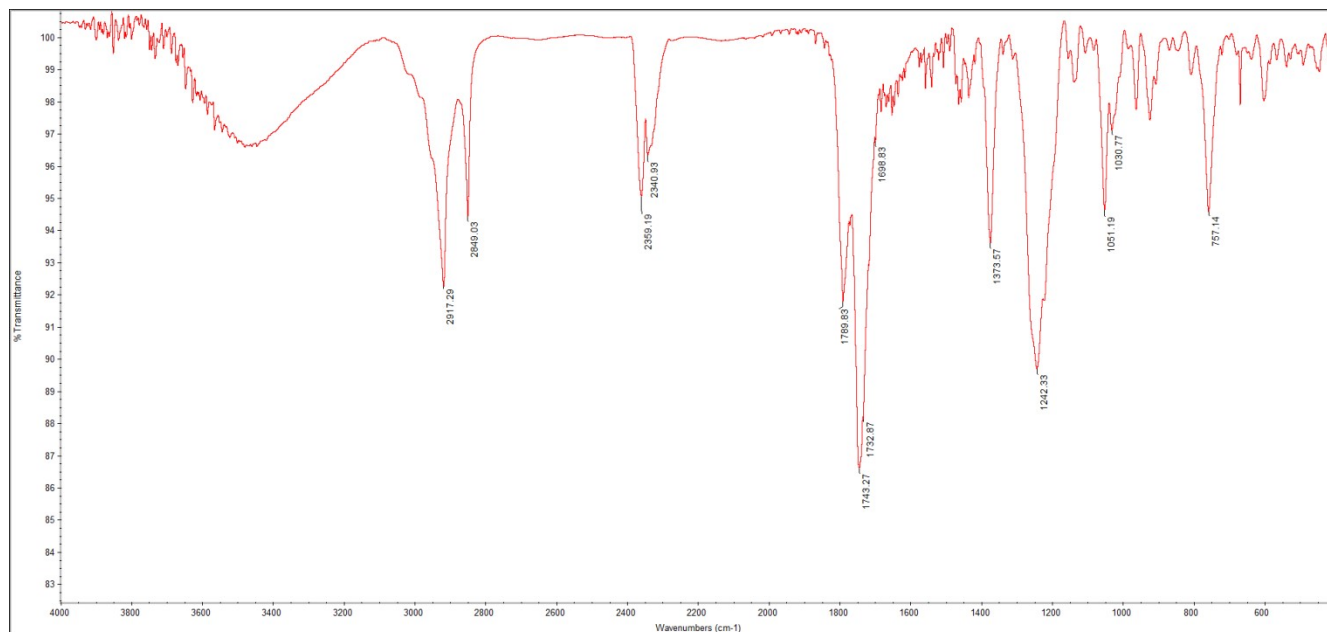

S2. IR spectrum of compound 4

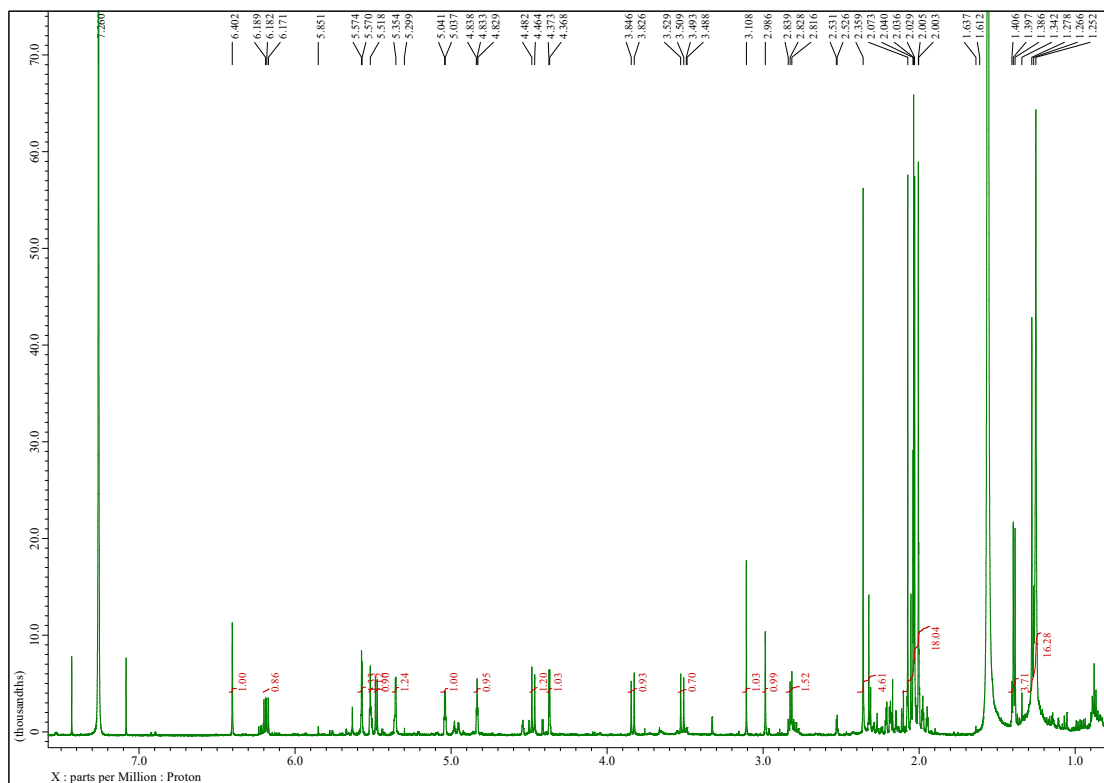

S3.  $^1\text{H}$  NMR spectrum (400 MHz) of compound **4** in  $\text{CDCl}_3$

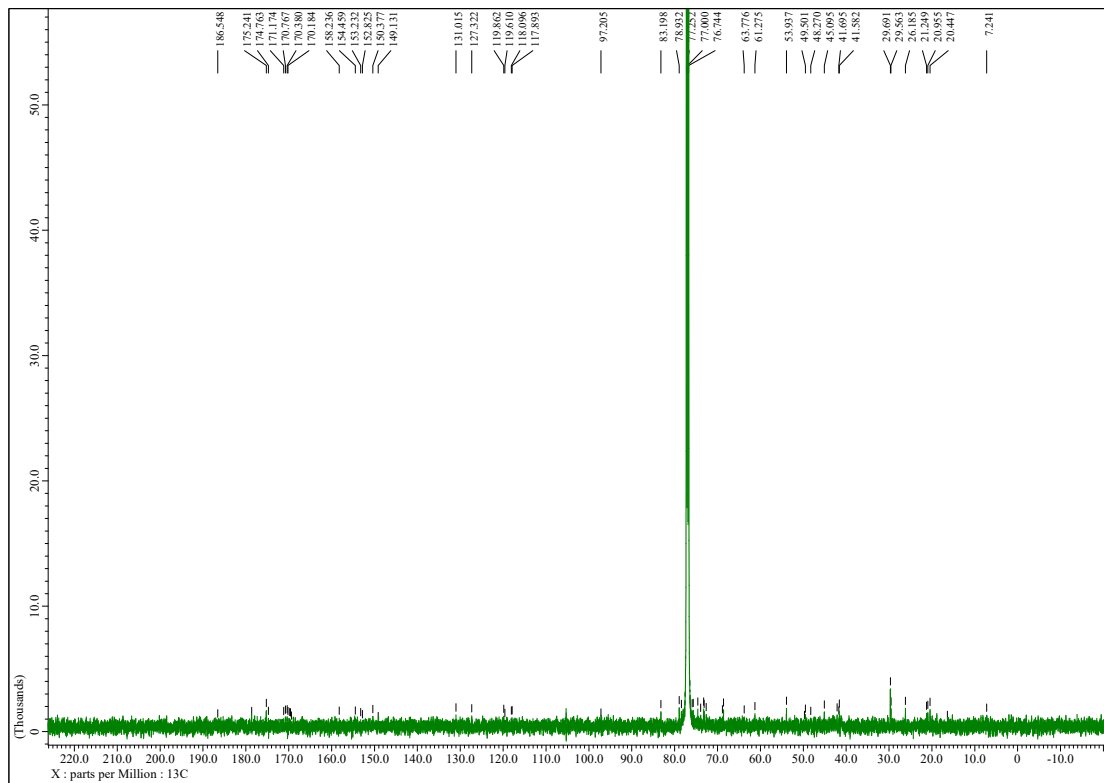

S4.  $^{13}\text{C}$  NMR spectrum (100 MHz) of compound **4** in  $\text{CDCl}_3$

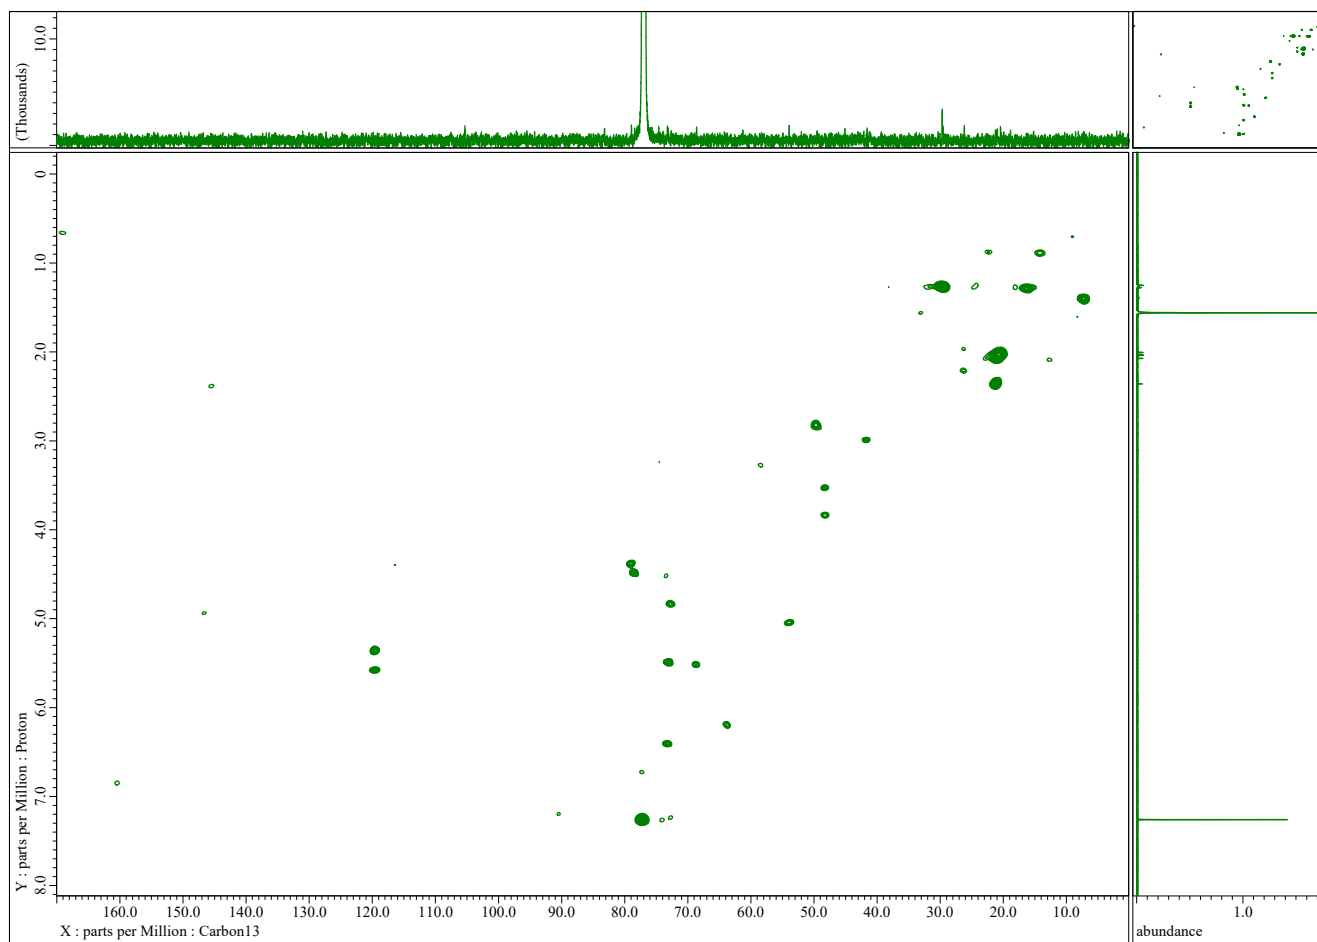

S5. HSQC spectrum of compound 4 in  $\text{CDCl}_3$

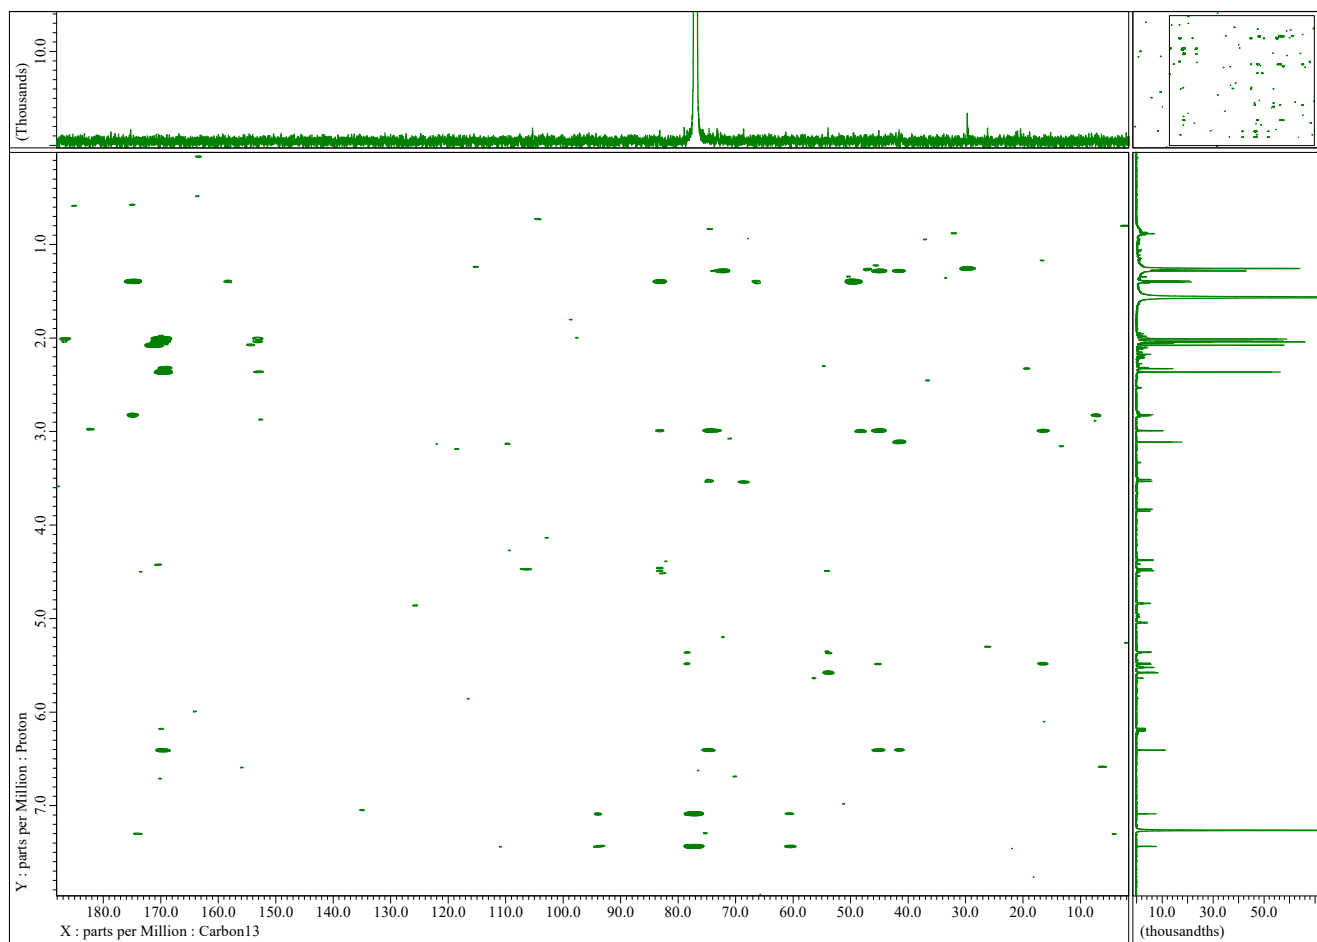

S6. HMBC spectrum of compound 4 in CDCl<sub>3</sub>

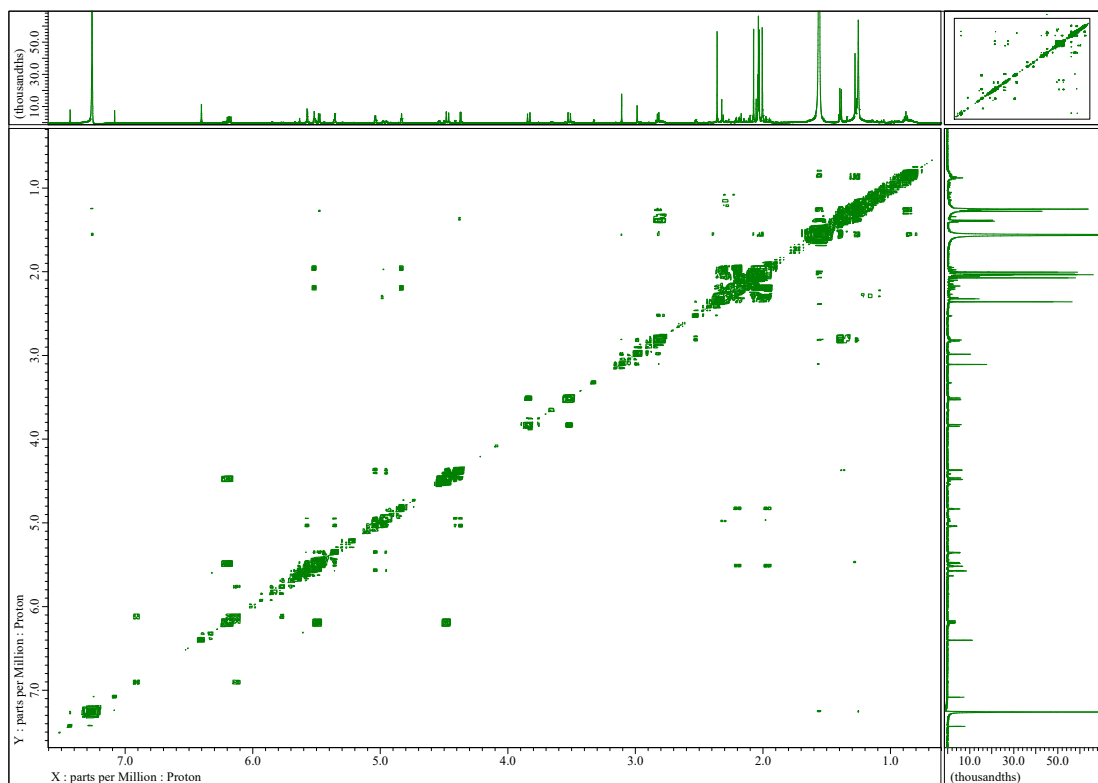

S7.  $^1\text{H}$ - $^1\text{H}$  COSY spectrum of compound **4** in  $\text{CDCl}_3$

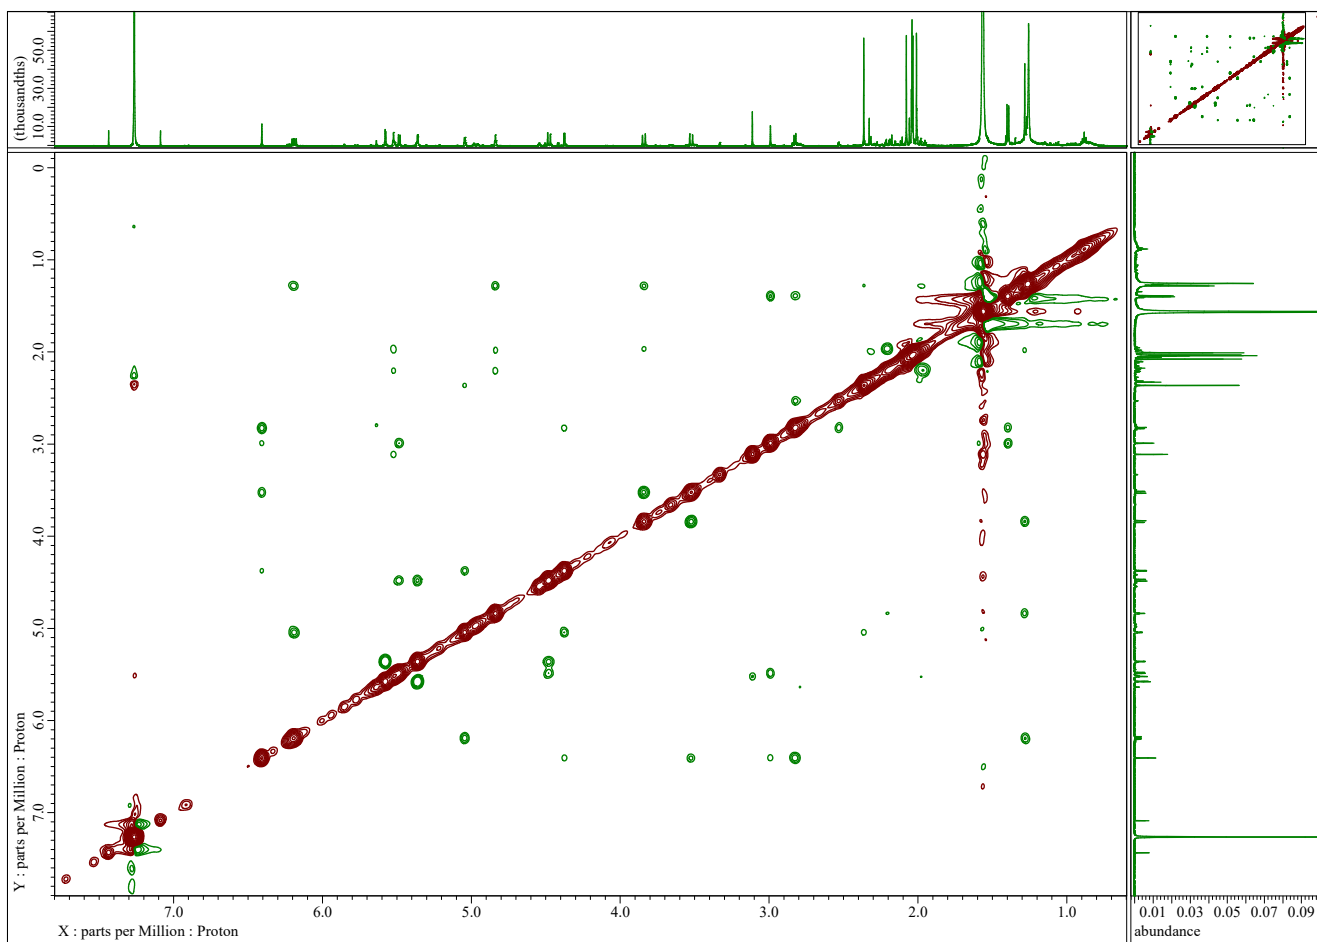

S8. NOESY spectrum of compound **4** in CDCl<sub>3</sub>

NJ-5-2-4-2-3-5-18 #17 RT: 0.12 AV: 1 NL: 1.25E5  
T: FTMS + p ESI sid=35.00 Full ms [100.0000-1000.0000]

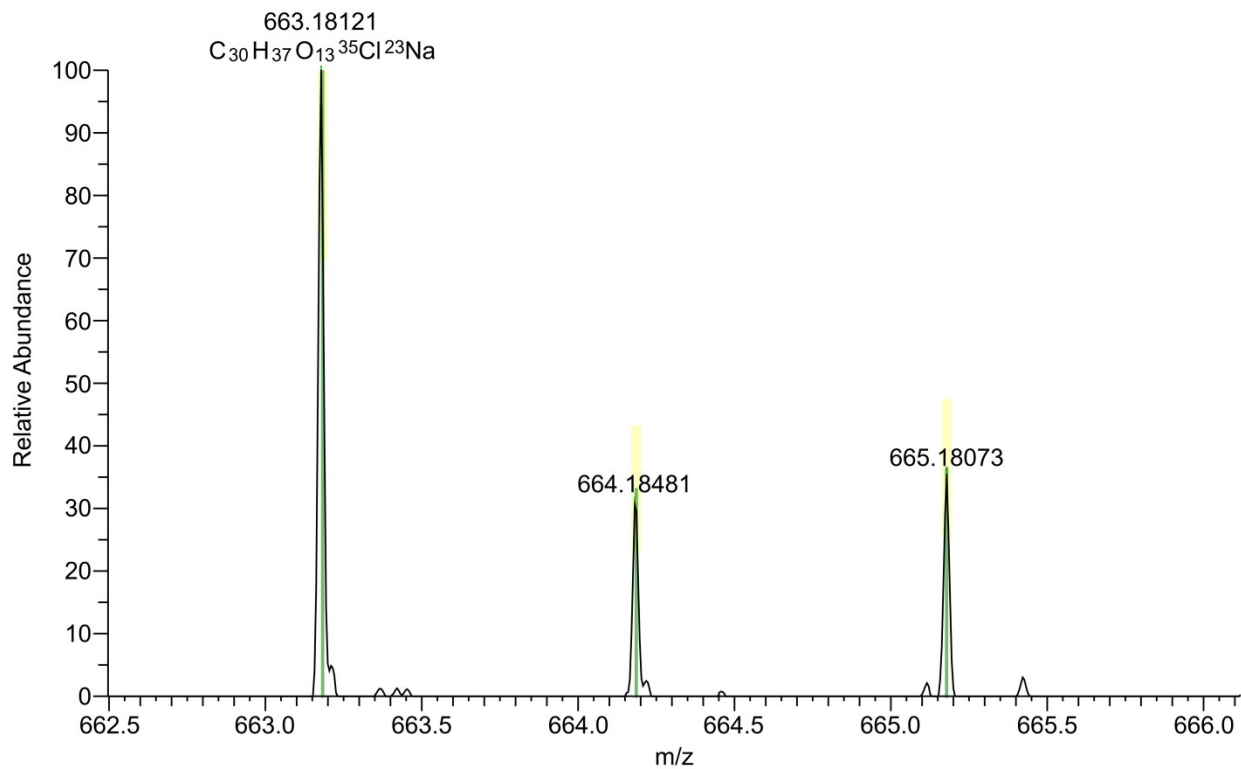

S9. HRESIMS spectrum of compound 5

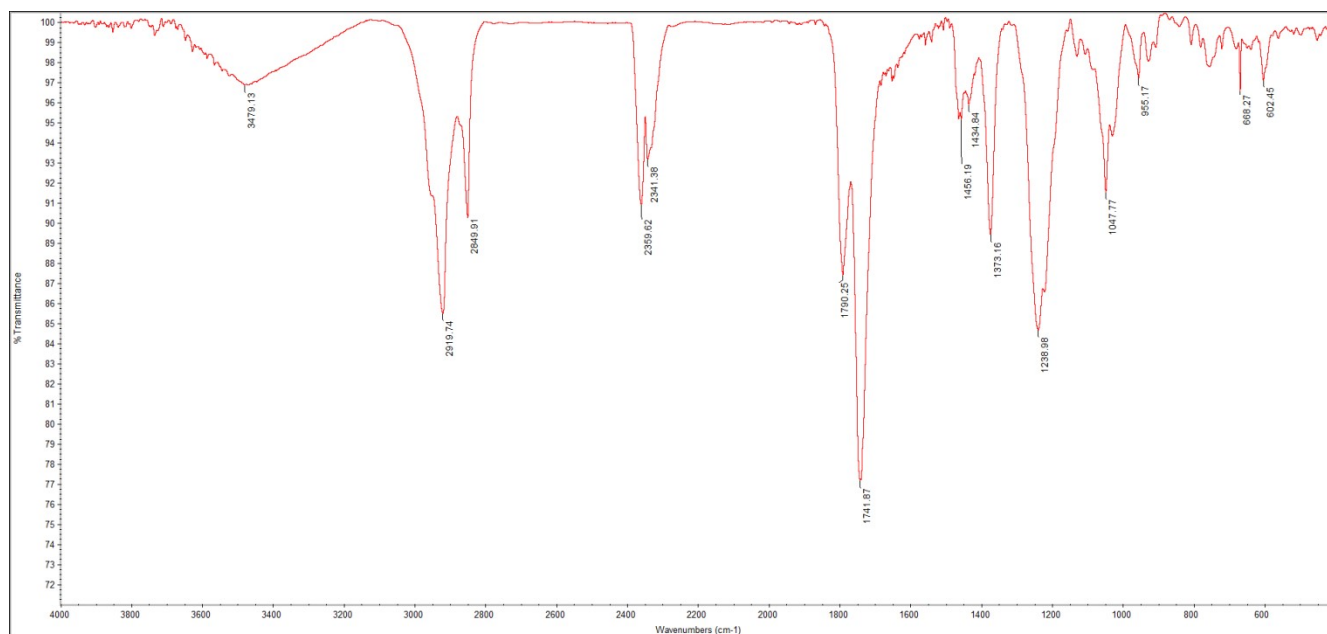

S10. IR spectrum of compound 5



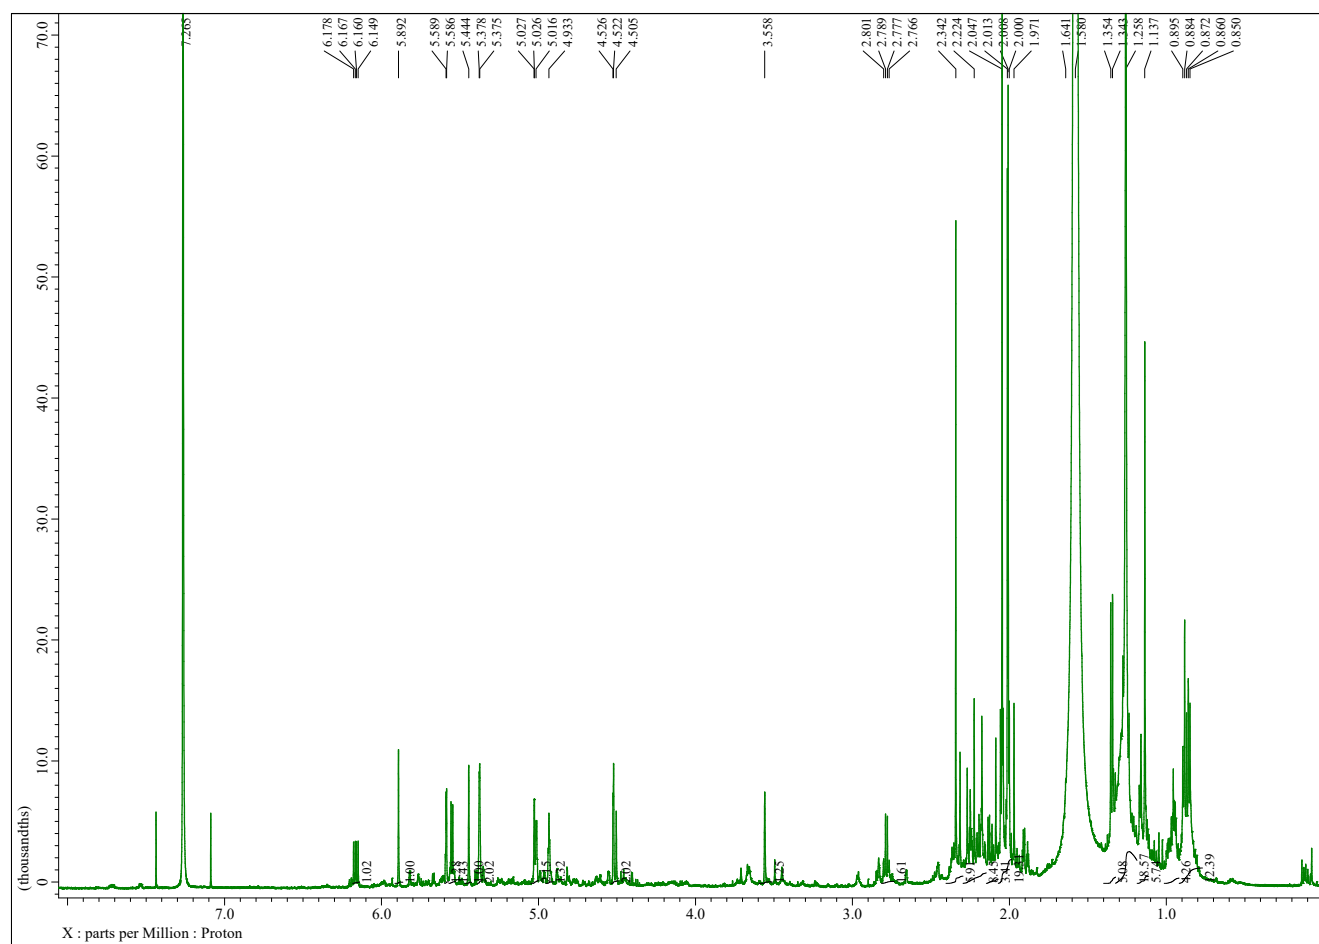

S11.  $^1\text{H}$  NMR spectrum (600 MHz) of compound **5** in  $\text{CDCl}_3$

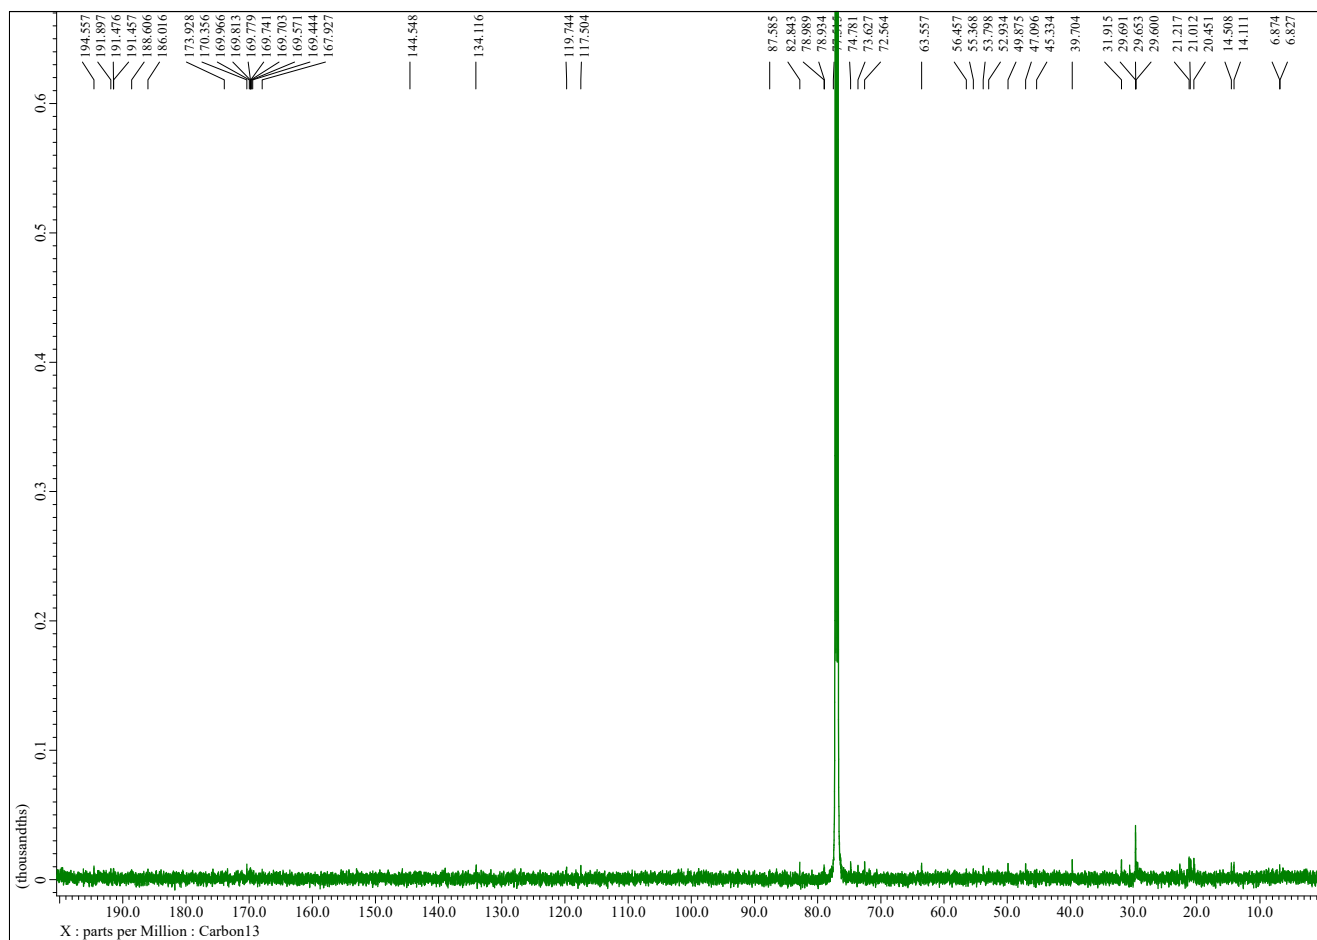

S12.  $^{13}\text{C}$  NMR spectrum (600 MHz) of compound **5** in  $\text{CDCl}_3$

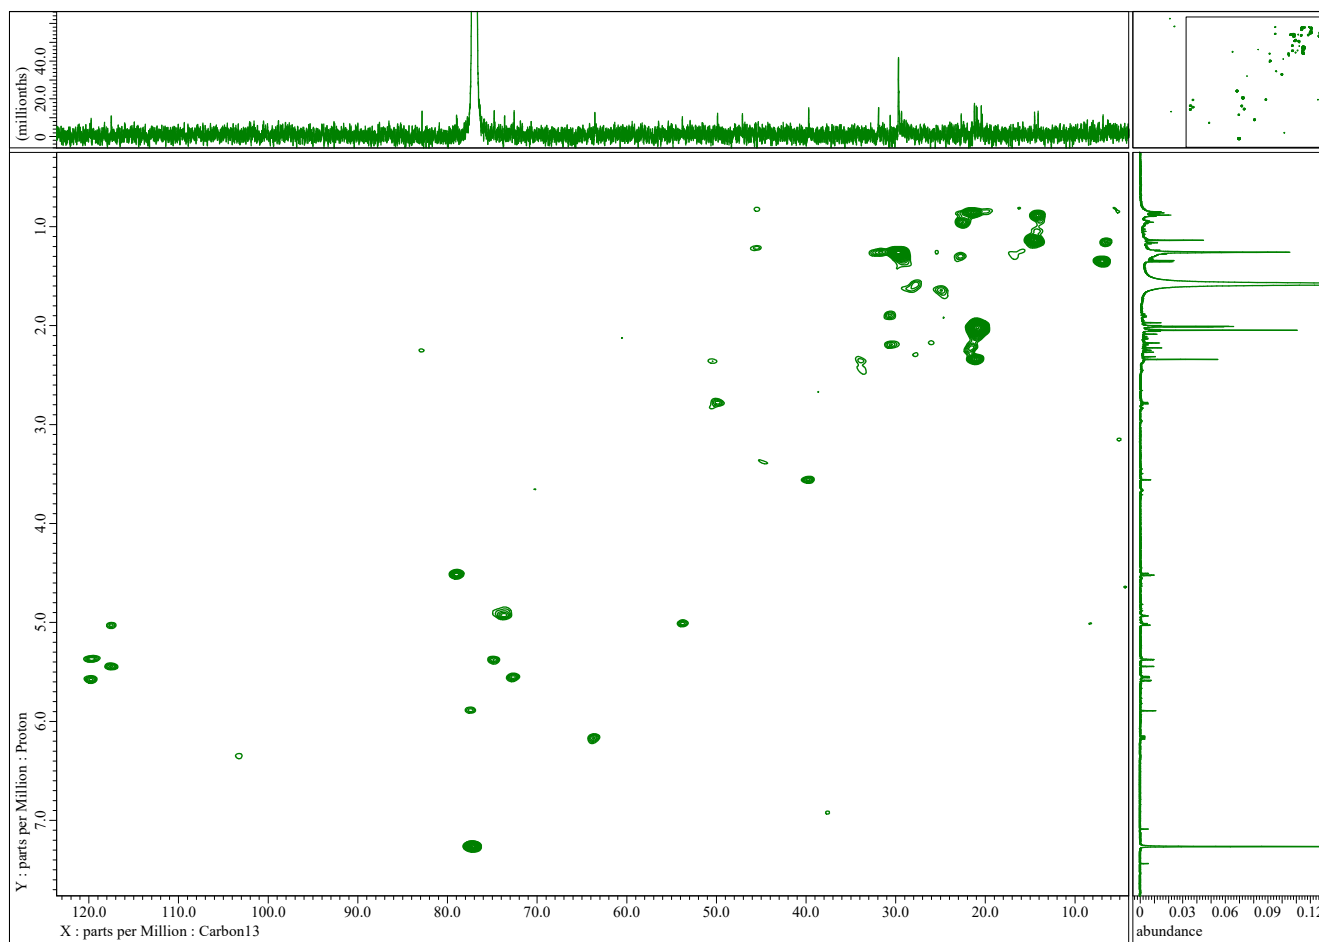

S13. HSQC spectrum of compound 5 in CDCl<sub>3</sub>

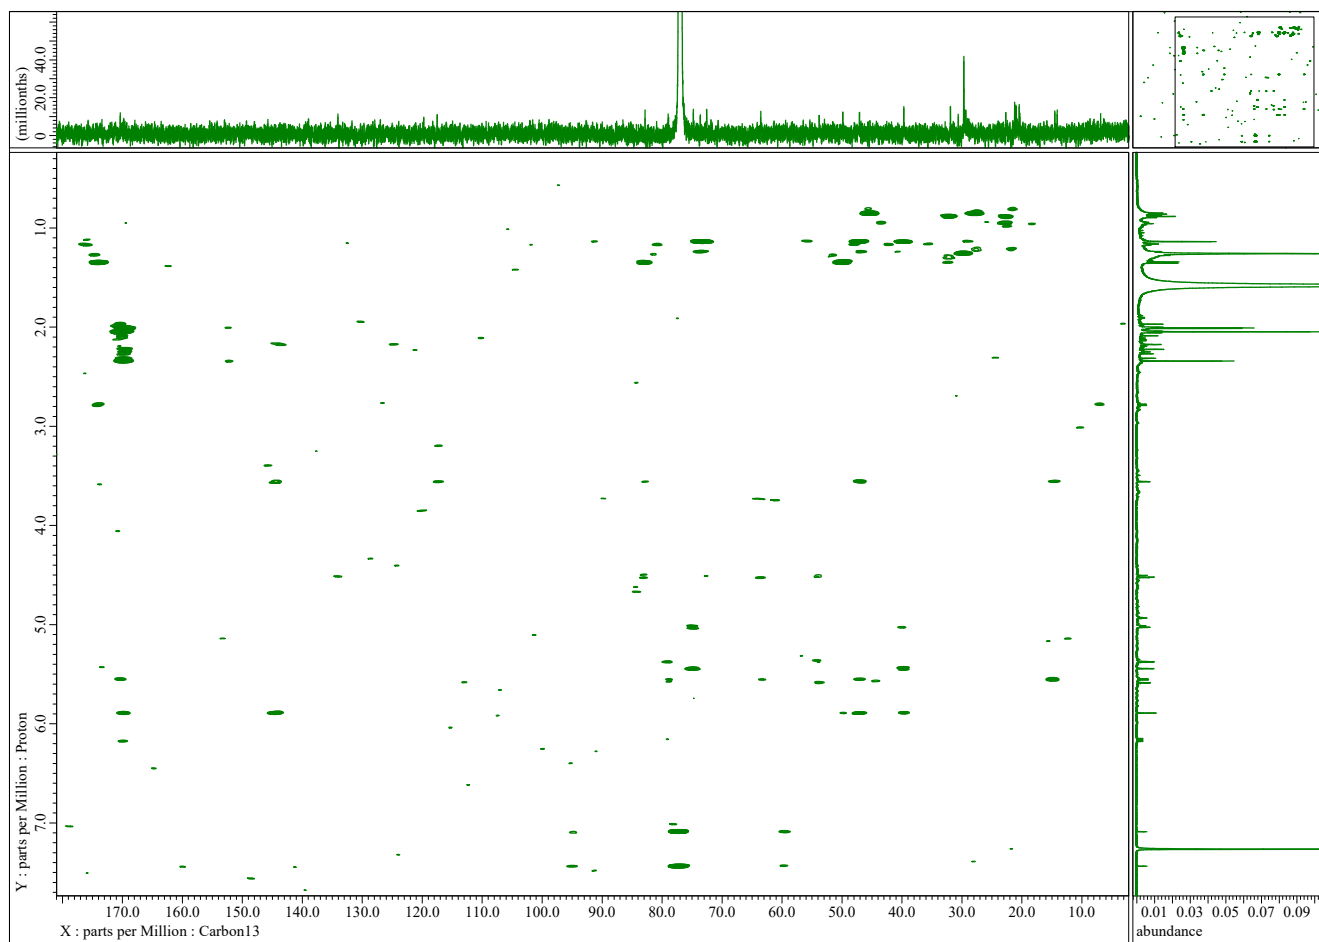

S14. HMBC spectrum of compound **5** in CDCl<sub>3</sub>

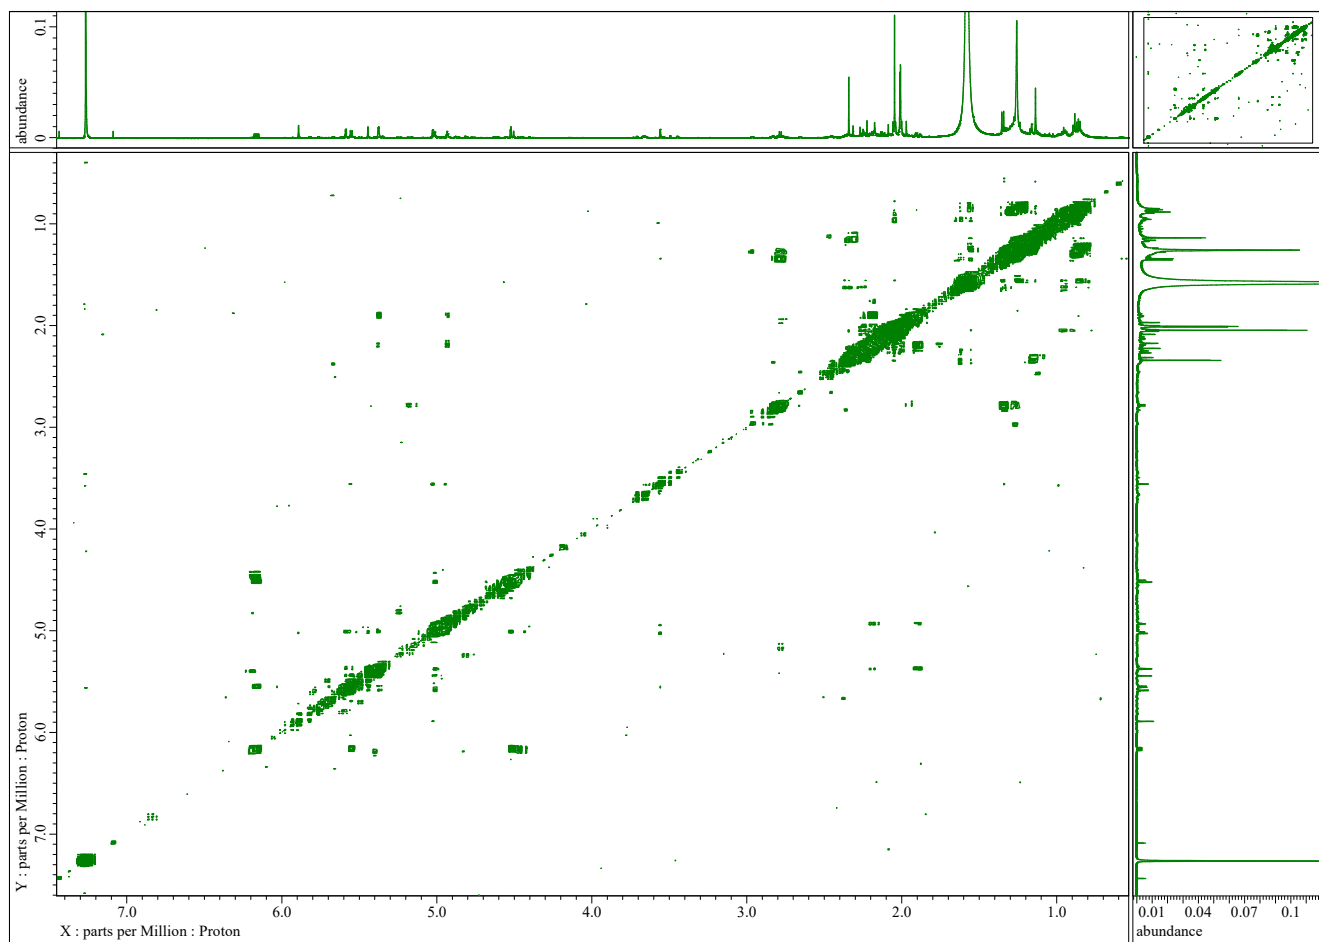

S15.  $^1\text{H}$ - $^1\text{H}$  COSY spectrum of compound **5** in  $\text{CDCl}_3$

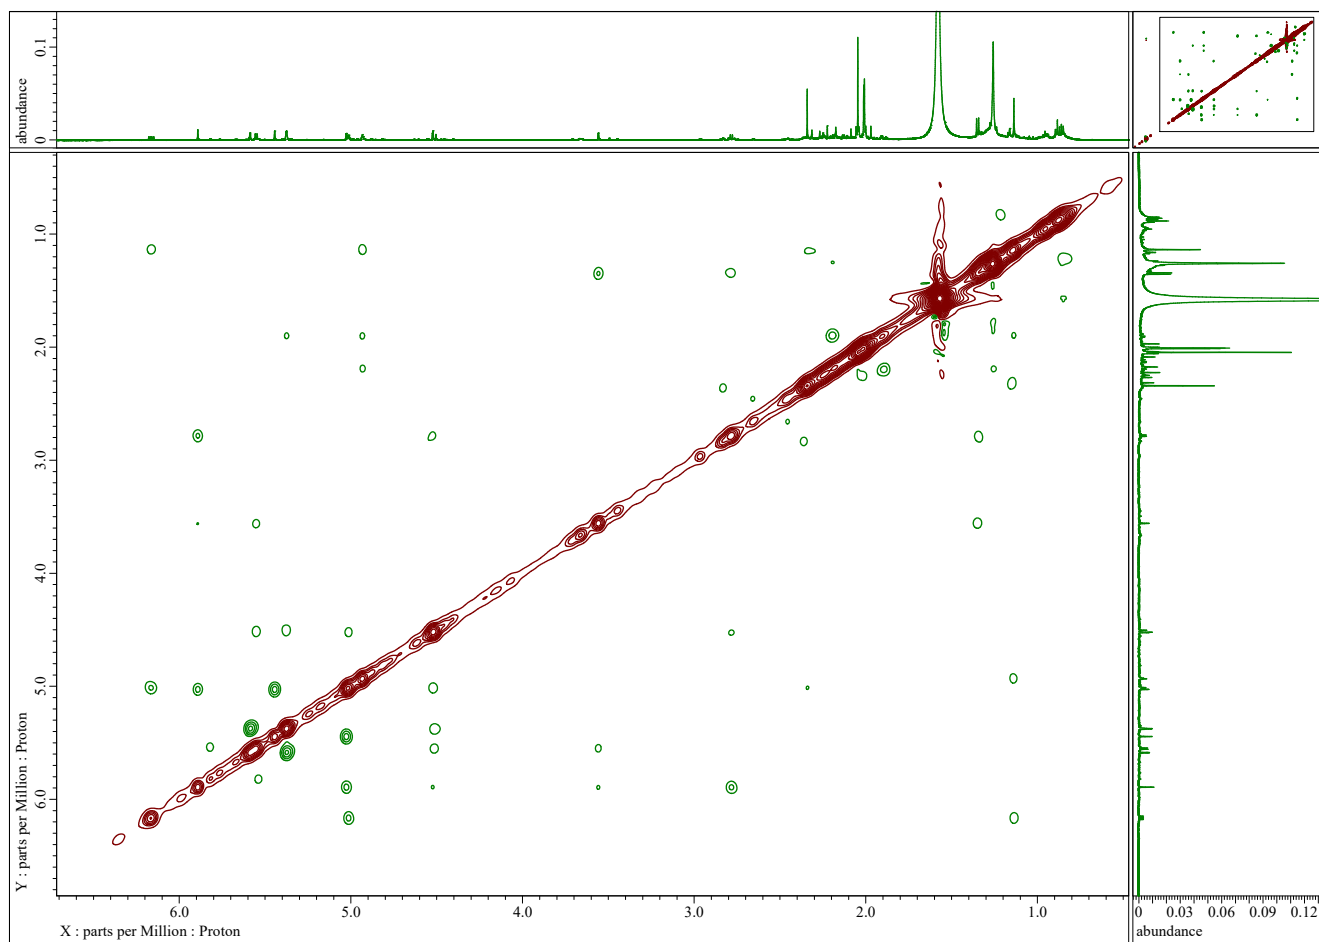

S16. NOESY spectrum of compound **5** in CDCl<sub>3</sub>

S17. Single-crystal X-ray Crystallography of compound **1**

Table 1. Crystal data and structure refinement for ic22450.

|                                   |                                                       |          |
|-----------------------------------|-------------------------------------------------------|----------|
| Identification code               | ic22450                                               |          |
| Empirical formula                 | C <sub>30</sub> H <sub>38</sub> Cl O <sub>14.50</sub> |          |
| Formula weight                    | 666.05                                                |          |
| Temperature                       | 200(2) K                                              |          |
| Wavelength                        | 1.54178 Å                                             |          |
| Crystal system                    | Orthorhombic                                          |          |
| Space group                       | P2 <sub>1</sub> 2 <sub>1</sub> 2 <sub>1</sub>         |          |
| Unit cell dimensions              | a = 12.2945(2) Å                                      | a = 90°. |
|                                   | b = 12.4454(2) Å                                      | b = 90°. |
|                                   | c = 22.2997(4) Å                                      | g = 90°. |
| Volume                            | 3412.08(10) Å <sup>3</sup>                            |          |
| Z                                 | 4                                                     |          |
| Density (calculated)              | 1.297 Mg/m <sup>3</sup>                               |          |
| Absorption coefficient            | 1.567 mm <sup>-1</sup>                                |          |
| F(000)                            | 1404                                                  |          |
| Crystal size                      | 0.363 x 0.235 x 0.198 mm <sup>3</sup>                 |          |
| Theta range for data collection   | 4.068 to 68.349°.                                     |          |
| Index ranges                      | -14 ≤ h ≤ 13, -15 ≤ k ≤ 15, -26 ≤ l ≤ 26              |          |
| Reflections collected             | 34394                                                 |          |
| Independent reflections           | 6232 [R(int) = 0.0329]                                |          |
| Completeness to theta = 67.679°   | 99.9 %                                                |          |
| Absorption correction             | Semi-empirical from equivalents                       |          |
| Max. and min. transmission        | 0.9798 and 0.7879                                     |          |
| Refinement method                 | Full-matrix least-squares on F <sup>2</sup>           |          |
| Data / restraints / parameters    | 6232 / 6 / 425                                        |          |
| Goodness-of-fit on F <sup>2</sup> | 1.044                                                 |          |
| Final R indices [I > 2σ(I)]       | R1 = 0.0292, wR2 = 0.0758                             |          |
| R indices (all data)              | R1 = 0.0310, wR2 = 0.0772                             |          |
| Absolute structure parameter      | 0.000(5)                                              |          |
| Extinction coefficient            | n/a                                                   |          |
| Largest diff. peak and hole       | 0.224 and -0.201 e.Å <sup>-3</sup>                    |          |

Table 2. Atomic coordinates ( $\times 10^4$ ) and equivalent isotropic displacement parameters ( $\text{\AA}^2 \times 10^3$ ) for ic22450.  $U(\text{eq})$  is defined as one third of the trace of the orthogonalized  $U^{ij}$  tensor.

|       | x        | y       | z       | $U(\text{eq})$ |
|-------|----------|---------|---------|----------------|
| Cl(1) | 11115(1) | 7069(1) | 6745(1) | 49(1)          |
| O(1)  | 7588(2)  | 2488(1) | 6082(1) | 45(1)          |
| O(2)  | 7107(2)  | 2483(2) | 7053(1) | 70(1)          |
| O(3)  | 9367(1)  | 3220(1) | 6504(1) | 36(1)          |
| O(4)  | 10795(2) | 3752(2) | 5945(1) | 52(1)          |
| O(5)  | 7754(1)  | 5669(1) | 6612(1) | 30(1)          |
| O(6)  | 8841(1)  | 7750(1) | 6771(1) | 36(1)          |
| O(7)  | 8854(1)  | 5602(1) | 5282(1) | 30(1)          |
| O(8)  | 9133(2)  | 7002(2) | 4660(1) | 53(1)          |
| O(9)  | 6154(1)  | 6617(1) | 4702(1) | 41(1)          |
| O(10) | 4470(1)  | 5301(1) | 5288(1) | 39(1)          |
| O(11) | 3203(2)  | 5834(2) | 4629(1) | 61(1)          |
| O(12) | 5381(1)  | 3653(1) | 5953(1) | 38(1)          |
| O(13) | 4785(2)  | 1951(2) | 6012(1) | 69(1)          |
| O(14) | 7391(2)  | 8523(1) | 7180(1) | 46(1)          |
| C(1)  | 7114(2)  | 3988(2) | 5466(1) | 30(1)          |
| C(2)  | 7568(2)  | 3647(2) | 6088(1) | 32(1)          |
| C(3)  | 8711(2)  | 4073(2) | 6256(1) | 31(1)          |
| C(4)  | 8593(2)  | 4909(2) | 6759(1) | 32(1)          |
| C(5)  | 9638(2)  | 5449(2) | 6925(1) | 36(1)          |
| C(6)  | 9995(2)  | 6279(2) | 6476(1) | 36(1)          |
| C(7)  | 9074(2)  | 7017(2) | 6283(1) | 32(1)          |
| C(8)  | 7979(2)  | 6449(2) | 6160(1) | 28(1)          |
| C(9)  | 7841(2)  | 6045(2) | 5508(1) | 27(1)          |
| C(10) | 6893(2)  | 5235(2) | 5434(1) | 27(1)          |
| C(11) | 6238(2)  | 5500(2) | 4864(1) | 31(1)          |
| C(12) | 5168(2)  | 4921(2) | 4809(1) | 35(1)          |
| C(13) | 5329(2)  | 3722(2) | 4869(1) | 39(1)          |
| C(14) | 5995(2)  | 3410(2) | 5414(1) | 35(1)          |
| C(15) | 7833(2)  | 3552(2) | 4954(1) | 36(1)          |
| C(16) | 10193(2) | 5142(2) | 7404(1) | 51(1)          |



|        |          |          |         |        |
|--------|----------|----------|---------|--------|
| C(17)  | 7176(2)  | 7370(2)  | 6299(1) | 32(1)  |
| C(18)  | 6000(2)  | 7102(2)  | 6453(1) | 42(1)  |
| C(19)  | 7762(2)  | 7948(2)  | 6800(1) | 34(1)  |
| C(20)  | 6724(2)  | 5893(2)  | 4306(1) | 40(1)  |
| C(21)  | 7324(2)  | 2004(2)  | 6606(1) | 56(1)  |
| C(22)  | 7335(4)  | 813(2)   | 6540(2) | 92(1)  |
| C(23)  | 10417(2) | 3182(2)  | 6326(1) | 38(1)  |
| C(24)  | 11023(2) | 2346(2)  | 6672(1) | 53(1)  |
| C(25)  | 9412(2)  | 6152(2)  | 4851(1) | 35(1)  |
| C(26)  | 10376(2) | 5515(2)  | 4654(1) | 51(1)  |
| C(27)  | 3501(2)  | 5710(2)  | 5138(1) | 41(1)  |
| C(28)  | 2850(2)  | 5956(2)  | 5685(1) | 54(1)  |
| C(29)  | 4814(2)  | 2844(2)  | 6209(1) | 50(1)  |
| C(30)  | 4264(3)  | 3227(3)  | 6765(2) | 80(1)  |
| O(15)  | 6829(11) | 5507(10) | 8431(6) | 116(3) |
| O(15') | 6412(13) | 3418(13) | 8147(6) | 116(3) |

---

Table 3. Bond lengths [Å] and angles [°] for ic22450.

---

|             |          |
|-------------|----------|
| Cl(1)-C(6)  | 1.794(2) |
| O(1)-C(21)  | 1.352(3) |
| O(1)-C(2)   | 1.443(2) |
| O(2)-C(21)  | 1.193(4) |
| O(3)-C(23)  | 1.351(3) |
| O(3)-C(3)   | 1.444(2) |
| O(4)-C(23)  | 1.201(3) |
| O(5)-C(8)   | 1.426(2) |
| O(5)-C(4)   | 1.438(2) |
| O(6)-C(19)  | 1.351(3) |
| O(6)-C(7)   | 1.450(2) |
| O(7)-C(25)  | 1.365(3) |
| O(7)-C(9)   | 1.452(2) |
| O(8)-C(25)  | 1.190(3) |
| O(9)-C(11)  | 1.440(3) |
| O(9)-C(20)  | 1.443(3) |
| O(10)-C(27) | 1.339(3) |
| O(10)-C(12) | 1.450(3) |
| O(11)-C(27) | 1.202(3) |
| O(12)-C(29) | 1.351(3) |
| O(12)-C(14) | 1.452(3) |
| O(13)-C(29) | 1.196(4) |
| O(14)-C(19) | 1.200(3) |
| C(1)-C(15)  | 1.542(3) |
| C(1)-C(2)   | 1.553(3) |
| C(1)-C(14)  | 1.557(3) |
| C(1)-C(10)  | 1.577(3) |
| C(2)-C(3)   | 1.548(3) |
| C(3)-C(4)   | 1.537(3) |
| C(4)-C(5)   | 1.497(3) |
| C(5)-C(16)  | 1.325(3) |
| C(5)-C(6)   | 1.504(3) |
| C(6)-C(7)   | 1.519(3) |
| C(7)-C(8)   | 1.545(3) |

|             |          |
|-------------|----------|
| C(8)-C(17)  | 1.544(3) |
| C(8)-C(9)   | 1.546(3) |
| C(9)-C(10)  | 1.550(3) |
| C(10)-C(11) | 1.540(3) |
| C(11)-C(20) | 1.465(3) |
| C(11)-C(12) | 1.505(3) |
| C(12)-C(13) | 1.512(3) |
| C(13)-C(14) | 1.515(3) |
| C(17)-C(19) | 1.510(3) |
| C(17)-C(18) | 1.523(3) |
| C(21)-C(22) | 1.490(4) |
| C(23)-C(24) | 1.495(3) |
| C(25)-C(26) | 1.492(3) |
| C(27)-C(28) | 1.490(4) |
| C(29)-C(30) | 1.489(4) |

|                   |            |
|-------------------|------------|
| C(21)-O(1)-C(2)   | 115.7(2)   |
| C(23)-O(3)-C(3)   | 116.52(17) |
| C(8)-O(5)-C(4)    | 118.08(16) |
| C(19)-O(6)-C(7)   | 110.13(16) |
| C(25)-O(7)-C(9)   | 119.05(16) |
| C(11)-O(9)-C(20)  | 61.06(14)  |
| C(27)-O(10)-C(12) | 117.79(18) |
| C(29)-O(12)-C(14) | 117.56(19) |
| C(15)-C(1)-C(2)   | 110.97(17) |
| C(15)-C(1)-C(14)  | 106.74(17) |
| C(2)-C(1)-C(14)   | 104.99(17) |
| C(15)-C(1)-C(10)  | 114.28(17) |
| C(2)-C(1)-C(10)   | 111.79(16) |
| C(14)-C(1)-C(10)  | 107.44(16) |
| O(1)-C(2)-C(3)    | 109.24(17) |
| O(1)-C(2)-C(1)    | 105.75(17) |
| C(3)-C(2)-C(1)    | 116.67(18) |
| O(3)-C(3)-C(4)    | 105.66(16) |
| O(3)-C(3)-C(2)    | 110.35(16) |
| C(4)-C(3)-C(2)    | 108.82(17) |

|                   |            |
|-------------------|------------|
| O(5)-C(4)-C(5)    | 112.08(17) |
| O(5)-C(4)-C(3)    | 110.22(16) |
| C(5)-C(4)-C(3)    | 113.78(18) |
| C(16)-C(5)-C(4)   | 120.8(2)   |
| C(16)-C(5)-C(6)   | 125.8(2)   |
| C(4)-C(5)-C(6)    | 113.26(18) |
| C(5)-C(6)-C(7)    | 112.74(19) |
| C(5)-C(6)-Cl(1)   | 112.19(15) |
| C(7)-C(6)-Cl(1)   | 109.62(16) |
| O(6)-C(7)-C(6)    | 108.31(16) |
| O(6)-C(7)-C(8)    | 104.42(16) |
| C(6)-C(7)-C(8)    | 115.04(17) |
| O(5)-C(8)-C(17)   | 103.82(15) |
| O(5)-C(8)-C(7)    | 110.76(16) |
| C(17)-C(8)-C(7)   | 100.45(16) |
| O(5)-C(8)-C(9)    | 114.94(16) |
| C(17)-C(8)-C(9)   | 111.13(16) |
| C(7)-C(8)-C(9)    | 114.26(16) |
| O(7)-C(9)-C(8)    | 110.82(16) |
| O(7)-C(9)-C(10)   | 111.16(15) |
| C(8)-C(9)-C(10)   | 113.22(15) |
| C(11)-C(10)-C(9)  | 110.04(16) |
| C(11)-C(10)-C(1)  | 109.74(16) |
| C(9)-C(10)-C(1)   | 120.41(17) |
| O(9)-C(11)-C(20)  | 59.58(14)  |
| O(9)-C(11)-C(12)  | 112.25(18) |
| C(20)-C(11)-C(12) | 116.52(19) |
| O(9)-C(11)-C(10)  | 116.77(17) |
| C(20)-C(11)-C(10) | 123.97(19) |
| C(12)-C(11)-C(10) | 115.04(18) |
| O(10)-C(12)-C(11) | 107.49(17) |
| O(10)-C(12)-C(13) | 109.50(19) |
| C(11)-C(12)-C(13) | 110.51(19) |
| C(12)-C(13)-C(14) | 113.25(19) |
| O(12)-C(14)-C(13) | 109.27(18) |
| O(12)-C(14)-C(1)  | 107.46(16) |

|                   |            |
|-------------------|------------|
| C(13)-C(14)-C(1)  | 114.80(18) |
| C(19)-C(17)-C(18) | 113.01(18) |
| C(19)-C(17)-C(8)  | 101.41(17) |
| C(18)-C(17)-C(8)  | 119.27(18) |
| O(14)-C(19)-O(6)  | 121.0(2)   |
| O(14)-C(19)-C(17) | 128.7(2)   |
| O(6)-C(19)-C(17)  | 110.29(18) |
| O(9)-C(20)-C(11)  | 59.37(13)  |
| O(2)-C(21)-O(1)   | 123.6(3)   |
| O(2)-C(21)-C(22)  | 125.6(3)   |
| O(1)-C(21)-C(22)  | 110.8(3)   |
| O(4)-C(23)-O(3)   | 123.9(2)   |
| O(4)-C(23)-C(24)  | 125.7(2)   |
| O(3)-C(23)-C(24)  | 110.4(2)   |
| O(8)-C(25)-O(7)   | 123.5(2)   |
| O(8)-C(25)-C(26)  | 126.5(2)   |
| O(7)-C(25)-C(26)  | 110.0(2)   |
| O(11)-C(27)-O(10) | 123.7(2)   |
| O(11)-C(27)-C(28) | 125.6(2)   |
| O(10)-C(27)-C(28) | 110.6(2)   |
| O(13)-C(29)-O(12) | 123.6(3)   |
| O(13)-C(29)-C(30) | 126.1(3)   |
| O(12)-C(29)-C(30) | 110.3(3)   |

---

Symmetry transformations used to generate equivalent atoms:

Table 4. Anisotropic displacement parameters ( $\text{\AA}^2 \times 10^3$ ) for ic22450. The anisotropic displacement factor exponent takes the form:  $-2p^2[h^2 a^* U^{11} + \dots + 2 h k a^* b^* U^{12}]$

|       | U <sup>11</sup> | U <sup>22</sup> | U <sup>33</sup> | U <sup>23</sup> | U <sup>13</sup> | U <sup>12</sup> |
|-------|-----------------|-----------------|-----------------|-----------------|-----------------|-----------------|
| Cl(1) | 35(1)           | 61(1)           | 51(1)           | -6(1)           | -9(1)           | -9(1)           |
| O(1)  | 53(1)           | 27(1)           | 54(1)           | 3(1)            | -15(1)          | -2(1)           |
| O(2)  | 83(2)           | 69(1)           | 59(1)           | 29(1)           | -3(1)           | -10(1)          |
| O(3)  | 36(1)           | 34(1)           | 38(1)           | 5(1)            | -5(1)           | 7(1)            |
| O(4)  | 40(1)           | 59(1)           | 58(1)           | 9(1)            | 5(1)            | 6(1)            |
| O(5)  | 31(1)           | 31(1)           | 27(1)           | 4(1)            | 1(1)            | 3(1)            |
| O(6)  | 41(1)           | 35(1)           | 33(1)           | -5(1)           | -2(1)           | -1(1)           |
| O(7)  | 24(1)           | 35(1)           | 29(1)           | 2(1)            | 4(1)            | 2(1)            |
| O(8)  | 50(1)           | 47(1)           | 62(1)           | 18(1)           | 20(1)           | 3(1)            |
| O(9)  | 40(1)           | 40(1)           | 41(1)           | 6(1)            | -8(1)           | 6(1)            |
| O(10) | 27(1)           | 52(1)           | 38(1)           | -1(1)           | -1(1)           | 7(1)            |
| O(11) | 40(1)           | 81(1)           | 63(1)           | 8(1)            | -13(1)          | 15(1)           |
| O(12) | 34(1)           | 43(1)           | 38(1)           | 1(1)            | 6(1)            | -6(1)           |
| O(13) | 80(2)           | 58(1)           | 70(1)           | 5(1)            | 4(1)            | -32(1)          |
| O(14) | 60(1)           | 38(1)           | 40(1)           | -9(1)           | 7(1)            | 4(1)            |
| C(1)  | 27(1)           | 32(1)           | 29(1)           | -3(1)           | 1(1)            | 0(1)            |
| C(2)  | 35(1)           | 26(1)           | 35(1)           | 3(1)            | -2(1)           | 1(1)            |
| C(3)  | 32(1)           | 28(1)           | 34(1)           | 4(1)            | -5(1)           | 4(1)            |
| C(4)  | 34(1)           | 32(1)           | 31(1)           | 3(1)            | -4(1)           | 5(1)            |
| C(5)  | 36(1)           | 37(1)           | 36(1)           | -6(1)           | -6(1)           | 6(1)            |
| C(6)  | 29(1)           | 43(1)           | 35(1)           | -7(1)           | -4(1)           | -1(1)           |
| C(7)  | 34(1)           | 33(1)           | 27(1)           | -2(1)           | 0(1)            | -3(1)           |
| C(8)  | 28(1)           | 32(1)           | 25(1)           | 2(1)            | 1(1)            | 2(1)            |
| C(9)  | 24(1)           | 30(1)           | 27(1)           | 1(1)            | 1(1)            | 3(1)            |
| C(10) | 24(1)           | 33(1)           | 24(1)           | -1(1)           | 1(1)            | 2(1)            |
| C(11) | 28(1)           | 36(1)           | 29(1)           | 0(1)            | -2(1)           | 5(1)            |
| C(12) | 27(1)           | 49(1)           | 30(1)           | -2(1)           | -4(1)           | 2(1)            |
| C(13) | 31(1)           | 47(1)           | 39(1)           | -9(1)           | -2(1)           | -3(1)           |
| C(14) | 34(1)           | 34(1)           | 36(1)           | -5(1)           | 2(1)            | -1(1)           |
| C(15) | 33(1)           | 38(1)           | 37(1)           | -6(1)           | 2(1)            | 6(1)            |
| C(16) | 56(2)           | 50(1)           | 47(1)           | -1(1)           | -21(1)          | 5(1)            |

|        |        |        |        |        |        |        |
|--------|--------|--------|--------|--------|--------|--------|
| C(17)  | 37(1)  | 30(1)  | 28(1)  | 2(1)   | 3(1)   | 6(1)   |
| C(18)  | 35(1)  | 46(1)  | 44(1)  | -6(1)  | 4(1)   | 6(1)   |
| C(19)  | 44(1)  | 26(1)  | 32(1)  | 5(1)   | 3(1)   | 2(1)   |
| C(20)  | 38(1)  | 53(1)  | 31(1)  | 4(1)   | -2(1)  | 0(1)   |
| C(21)  | 52(2)  | 45(1)  | 69(2)  | 23(1)  | -26(1) | -13(1) |
| C(22)  | 113(3) | 42(2)  | 120(3) | 29(2)  | -59(3) | -17(2) |
| C(23)  | 38(1)  | 39(1)  | 37(1)  | -8(1)  | -8(1)  | 7(1)   |
| C(24)  | 52(2)  | 61(2)  | 47(1)  | -3(1)  | -12(1) | 23(1)  |
| C(25)  | 29(1)  | 42(1)  | 32(1)  | 0(1)   | 5(1)   | -5(1)  |
| C(26)  | 35(1)  | 63(2)  | 55(1)  | 2(1)   | 17(1)  | 4(1)   |
| C(27)  | 26(1)  | 38(1)  | 58(2)  | 4(1)   | -2(1)  | -1(1)  |
| C(28)  | 33(1)  | 57(2)  | 72(2)  | 3(1)   | 12(1)  | 5(1)   |
| C(29)  | 41(1)  | 63(2)  | 46(1)  | 9(1)   | -1(1)  | -14(1) |
| C(30)  | 72(2)  | 109(3) | 60(2)  | 4(2)   | 28(2)  | -23(2) |
| O(15)  | 116(6) | 112(6) | 119(6) | -20(5) | -16(5) | 24(5)  |
| O(15') | 116(6) | 112(6) | 119(6) | -20(5) | -16(5) | 24(5)  |

---

Table 5. Hydrogen coordinates ( $\times 10^4$ ) and isotropic displacement parameters ( $\text{\AA}^2 \times 10^{-3}$ ) for ic22450.

|        | x     | y    | z    | U(eq) |
|--------|-------|------|------|-------|
| H(2)   | 7043  | 3886 | 6403 | 39    |
| H(3)   | 9075  | 4398 | 5898 | 38    |
| H(4)   | 8340  | 4511 | 7124 | 39    |
| H(6)   | 10250 | 5887 | 6111 | 43    |
| H(7)   | 9300  | 7434 | 5920 | 38    |
| H(9)   | 7664  | 6685 | 5256 | 33    |
| H(10)  | 6388  | 5389 | 5775 | 33    |
| H(12)  | 4828  | 5088 | 4412 | 42    |
| H(13A) | 5696  | 3450 | 4504 | 47    |
| H(13B) | 4608  | 3370 | 4894 | 47    |
| H(14)  | 6126  | 2617 | 5400 | 42    |
| H(15A) | 7530  | 3777 | 4568 | 54    |
| H(15B) | 8572  | 3837 | 4997 | 54    |
| H(15C) | 7852  | 2766 | 4974 | 54    |
| H(16A) | 9929  | 4572 | 7648 | 62    |
| H(16B) | 10856 | 5492 | 7505 | 62    |
| H(17)  | 7167  | 7860 | 5944 | 38    |
| H(18A) | 5983  | 6511 | 6744 | 62    |
| H(18B) | 5614  | 6886 | 6088 | 62    |
| H(18C) | 5646  | 7736 | 6626 | 62    |
| H(20A) | 7526  | 5948 | 4287 | 48    |
| H(20B) | 6366  | 5694 | 3924 | 48    |
| H(22A) | 7200  | 478  | 6930 | 137   |
| H(22B) | 8046  | 582  | 6388 | 137   |
| H(22C) | 6766  | 594  | 6257 | 137   |
| H(24A) | 11694 | 2161 | 6459 | 80    |
| H(24B) | 10569 | 1703 | 6714 | 80    |
| H(24C) | 11203 | 2626 | 7071 | 80    |
| H(26A) | 10186 | 5094 | 4297 | 77    |
| H(26B) | 10599 | 5030 | 4977 | 77    |



|        |       |      |      |     |
|--------|-------|------|------|-----|
| H(26C) | 10976 | 6004 | 4557 | 77  |
| H(28A) | 2357  | 6557 | 5601 | 81  |
| H(28B) | 3340  | 6152 | 6014 | 81  |
| H(28C) | 2425  | 5322 | 5799 | 81  |
| H(30A) | 3989  | 2609 | 6991 | 121 |
| H(30B) | 3656  | 3698 | 6656 | 121 |
| H(30C) | 4785  | 3626 | 7012 | 121 |
| H(15D) | 6411  | 5588 | 8762 | 173 |
| H(15E) | 6358  | 5192 | 8120 | 173 |
| H(15F) | 6969  | 2983 | 8041 | 173 |
| H(15G) | 6720  | 4240 | 8039 | 173 |

---

## S18. Single-crystal X-ray Crystallography of compound 2

Table 1. Crystal data and structure refinement for ic22479.

|                                   |                                                    |           |
|-----------------------------------|----------------------------------------------------|-----------|
| Identification code               | .ic22479                                           |           |
| Empirical formula                 | C <sub>28</sub> H <sub>35</sub> Cl O <sub>12</sub> |           |
| Formula weight                    | 599.01                                             |           |
| Temperature                       | 200(2) K                                           |           |
| Wavelength                        | 1.54178 Å                                          |           |
| Crystal system                    | Hexagonal                                          |           |
| Space group                       | P6 <sub>1</sub>                                    |           |
| Unit cell dimensions              | a = 22.8317(3) Å                                   | a = 90°.  |
|                                   | b = 22.8317(3) Å                                   | b = 90°.  |
|                                   | c = 10.2937(2) Å                                   | g = 120°. |
| Volume                            | 4647.06(15) Å <sup>3</sup>                         |           |
| Z                                 | 6                                                  |           |
| Density (calculated)              | 1.284 Mg/m <sup>3</sup>                            |           |
| Absorption coefficient            | 1.605 mm <sup>-1</sup>                             |           |
| F(000)                            | 1896                                               |           |
| Crystal size                      | 0.191 x 0.102 x 0.049 mm <sup>3</sup>              |           |
| Theta range for data collection   | 3.872 to 74.402°.                                  |           |
| Index ranges                      | -28<=h<=27, -28<=k<=27, -12<=l<=11                 |           |
| Reflections collected             | 47636                                              |           |
| Independent reflections           | 6221 [R(int) = 0.0562]                             |           |
| Completeness to theta = 67.679°   | 99.9 %                                             |           |
| Absorption correction             | Semi-empirical from equivalents                    |           |
| Max. and min. transmission        | 0.9819 and 0.8637                                  |           |
| Refinement method                 | Full-matrix least-squares on F <sup>2</sup>        |           |
| Data / restraints / parameters    | 6221 / 1 / 377                                     |           |
| Goodness-of-fit on F <sup>2</sup> | 1.022                                              |           |
| Final R indices [I>2sigma(I)]     | R1 = 0.0358, wR2 = 0.0960                          |           |
| R indices (all data)              | R1 = 0.0393, wR2 = 0.0989                          |           |
| Absolute structure parameter      | -0.002(13)                                         |           |
| Extinction coefficient            | n/a                                                |           |
| Largest diff. peak and hole       | 0.199 and -0.224 e.Å <sup>-3</sup>                 |           |

Table 2. Atomic coordinates ( $\times 10^4$ ) and equivalent isotropic displacement parameters ( $\text{\AA}^2 \times 10^3$ ) for ic22479.  $U(\text{eq})$  is defined as one third of the trace of the orthogonalized  $U^{ij}$  tensor.

|       | x       | y       | z        | $U(\text{eq})$ |
|-------|---------|---------|----------|----------------|
| Cl(1) | 8378(1) | 6762(1) | 397(1)   | 46(1)          |
| O(1)  | 8199(1) | 7200(1) | 6527(2)  | 36(1)          |
| O(2)  | 7695(2) | 7609(2) | 5234(3)  | 77(1)          |
| O(3)  | 8551(1) | 5564(1) | 536(2)   | 43(1)          |
| O(4)  | 7626(1) | 5721(1) | 2634(2)  | 31(1)          |
| O(5)  | 9004(1) | 6040(1) | 4397(2)  | 31(1)          |
| O(6)  | 9423(1) | 5336(1) | 4238(3)  | 58(1)          |
| O(7)  | 7497(1) | 4237(1) | 5296(2)  | 45(1)          |
| O(8)  | 6447(1) | 5025(1) | 8371(2)  | 34(1)          |
| O(9)  | 6980(1) | 5411(2) | 10248(2) | 60(1)          |
| O(10) | 6828(1) | 5869(1) | 6393(2)  | 30(1)          |
| O(11) | 6682(1) | 6445(1) | 8025(3)  | 54(1)          |
| O(12) | 7828(2) | 4548(1) | -225(2)  | 60(1)          |
| C(1)  | 7991(1) | 6062(1) | 6199(2)  | 25(1)          |
| C(2)  | 8122(1) | 6722(1) | 5506(2)  | 29(1)          |
| C(3)  | 8741(1) | 7047(1) | 4670(3)  | 32(1)          |
| C(4)  | 8682(1) | 7072(1) | 3398(3)  | 34(1)          |
| C(5)  | 9216(1) | 7171(1) | 2473(3)  | 38(1)          |
| C(6)  | 8989(1) | 6672(2) | 1382(3)  | 38(1)          |
| C(7)  | 8727(1) | 5930(1) | 1756(2)  | 33(1)          |
| C(8)  | 8111(1) | 5510(1) | 2688(2)  | 28(1)          |
| C(9)  | 8318(1) | 5501(1) | 4146(2)  | 26(1)          |
| C(10) | 7800(1) | 5471(1) | 5185(2)  | 25(1)          |
| C(11) | 7521(1) | 4802(1) | 5952(3)  | 32(1)          |
| C(12) | 6892(1) | 4624(1) | 6721(3)  | 36(1)          |
| C(13) | 7075(1) | 5169(1) | 7727(2)  | 30(1)          |
| C(14) | 7375(1) | 5867(1) | 7114(2)  | 26(1)          |
| C(15) | 8583(1) | 6190(1) | 7094(3)  | 32(1)          |
| C(16) | 9864(2) | 7627(2) | 2586(4)  | 62(1)          |
| C(17) | 7829(1) | 4792(1) | 2088(3)  | 36(1)          |
| C(18) | 7081(2) | 4286(2) | 2276(3)  | 48(1)          |

|       |          |         |          |       |
|-------|----------|---------|----------|-------|
| C(19) | 8039(2)  | 4924(2) | 681(3)   | 43(1) |
| C(20) | 7949(2)  | 4532(2) | 6380(3)  | 45(1) |
| C(21) | 7984(2)  | 7636(2) | 6217(4)  | 49(1) |
| C(22) | 8173(3)  | 8157(2) | 7267(5)  | 74(1) |
| C(23) | 9503(1)  | 5888(2) | 4421(3)  | 37(1) |
| C(24) | 10172(2) | 6514(2) | 4651(3)  | 49(1) |
| C(25) | 6482(1)  | 5205(1) | 9608(3)  | 37(1) |
| C(26) | 5826(2)  | 5129(2) | 10077(4) | 56(1) |
| C(27) | 6481(1)  | 6115(1) | 7050(3)  | 37(1) |
| C(28) | 5809(2)  | 5889(2) | 6434(4)  | 50(1) |

---

Table 3. Bond lengths [ $\text{\AA}$ ] and angles [ $^\circ$ ] for ic22479.

---

|             |          |
|-------------|----------|
| Cl(1)-C(6)  | 1.818(3) |
| O(1)-C(21)  | 1.351(4) |
| O(1)-C(2)   | 1.461(3) |
| O(2)-C(21)  | 1.192(5) |
| O(3)-C(19)  | 1.348(4) |
| O(3)-C(7)   | 1.450(3) |
| O(4)-C(8)   | 1.410(3) |
| O(5)-C(23)  | 1.347(3) |
| O(5)-C(9)   | 1.452(3) |
| O(6)-C(23)  | 1.195(4) |
| O(7)-C(11)  | 1.434(3) |
| O(7)-C(20)  | 1.439(4) |
| O(8)-C(25)  | 1.328(3) |
| O(8)-C(13)  | 1.460(3) |
| O(9)-C(25)  | 1.190(4) |
| O(10)-C(27) | 1.360(3) |
| O(10)-C(14) | 1.455(3) |
| O(11)-C(27) | 1.199(4) |
| O(12)-C(19) | 1.193(4) |
| C(1)-C(15)  | 1.537(3) |
| C(1)-C(2)   | 1.556(3) |
| C(1)-C(14)  | 1.561(3) |
| C(1)-C(10)  | 1.585(3) |
| C(2)-C(3)   | 1.496(4) |
| C(3)-C(4)   | 1.321(4) |
| C(4)-C(5)   | 1.473(4) |
| C(5)-C(16)  | 1.322(5) |
| C(5)-C(6)   | 1.496(4) |
| C(6)-C(7)   | 1.536(4) |
| C(7)-C(8)   | 1.572(3) |
| C(8)-C(17)  | 1.558(4) |
| C(8)-C(9)   | 1.577(3) |
| C(9)-C(10)  | 1.570(3) |
| C(10)-C(11) | 1.545(3) |

|             |          |
|-------------|----------|
| C(11)-C(20) | 1.462(4) |
| C(11)-C(12) | 1.507(4) |
| C(12)-C(13) | 1.509(4) |
| C(13)-C(14) | 1.522(4) |
| C(17)-C(19) | 1.508(4) |
| C(17)-C(18) | 1.522(4) |
| C(21)-C(22) | 1.501(5) |
| C(23)-C(24) | 1.500(4) |
| C(25)-C(26) | 1.498(4) |
| C(27)-C(28) | 1.493(4) |

|                   |            |
|-------------------|------------|
| C(21)-O(1)-C(2)   | 115.4(2)   |
| C(19)-O(3)-C(7)   | 111.7(2)   |
| C(23)-O(5)-C(9)   | 118.5(2)   |
| C(11)-O(7)-C(20)  | 61.18(19)  |
| C(25)-O(8)-C(13)  | 117.8(2)   |
| C(27)-O(10)-C(14) | 115.2(2)   |
| C(15)-C(1)-C(2)   | 111.5(2)   |
| C(15)-C(1)-C(14)  | 105.85(19) |
| C(2)-C(1)-C(14)   | 105.17(18) |
| C(15)-C(1)-C(10)  | 113.53(19) |
| C(2)-C(1)-C(10)   | 111.12(19) |
| C(14)-C(1)-C(10)  | 109.20(18) |
| O(1)-C(2)-C(3)    | 108.2(2)   |
| O(1)-C(2)-C(1)    | 106.66(19) |
| C(3)-C(2)-C(1)    | 114.8(2)   |
| C(4)-C(3)-C(2)    | 120.0(2)   |
| C(3)-C(4)-C(5)    | 123.5(3)   |
| C(16)-C(5)-C(4)   | 125.4(3)   |
| C(16)-C(5)-C(6)   | 119.4(3)   |
| C(4)-C(5)-C(6)    | 115.1(2)   |
| C(5)-C(6)-C(7)    | 116.6(2)   |
| C(5)-C(6)-Cl(1)   | 109.0(2)   |
| C(7)-C(6)-Cl(1)   | 111.5(2)   |
| O(3)-C(7)-C(6)    | 105.2(2)   |
| O(3)-C(7)-C(8)    | 105.7(2)   |

|                   |            |
|-------------------|------------|
| C(6)-C(7)-C(8)    | 124.2(2)   |
| O(4)-C(8)-C(17)   | 111.3(2)   |
| O(4)-C(8)-C(7)    | 112.6(2)   |
| C(17)-C(8)-C(7)   | 100.0(2)   |
| O(4)-C(8)-C(9)    | 109.43(19) |
| C(17)-C(8)-C(9)   | 109.4(2)   |
| C(7)-C(8)-C(9)    | 113.9(2)   |
| O(5)-C(9)-C(10)   | 112.68(18) |
| O(5)-C(9)-C(8)    | 111.21(18) |
| C(10)-C(9)-C(8)   | 115.12(19) |
| C(11)-C(10)-C(9)  | 108.67(19) |
| C(11)-C(10)-C(1)  | 107.88(19) |
| C(9)-C(10)-C(1)   | 122.02(19) |
| O(7)-C(11)-C(20)  | 59.6(2)    |
| O(7)-C(11)-C(12)  | 113.7(2)   |
| C(20)-C(11)-C(12) | 118.4(2)   |
| O(7)-C(11)-C(10)  | 117.4(2)   |
| C(20)-C(11)-C(10) | 122.6(2)   |
| C(12)-C(11)-C(10) | 113.7(2)   |
| C(11)-C(12)-C(13) | 107.7(2)   |
| O(8)-C(13)-C(12)  | 106.8(2)   |
| O(8)-C(13)-C(14)  | 107.6(2)   |
| C(12)-C(13)-C(14) | 112.0(2)   |
| O(10)-C(14)-C(13) | 106.02(19) |
| O(10)-C(14)-C(1)  | 110.11(18) |
| C(13)-C(14)-C(1)  | 114.71(19) |
| C(19)-C(17)-C(18) | 113.4(2)   |
| C(19)-C(17)-C(8)  | 104.4(2)   |
| C(18)-C(17)-C(8)  | 117.7(2)   |
| O(12)-C(19)-O(3)  | 120.8(3)   |
| O(12)-C(19)-C(17) | 129.4(3)   |
| O(3)-C(19)-C(17)  | 109.8(2)   |
| O(7)-C(20)-C(11)  | 59.24(19)  |
| O(2)-C(21)-O(1)   | 123.8(3)   |
| O(2)-C(21)-C(22)  | 125.9(3)   |
| O(1)-C(21)-C(22)  | 110.3(3)   |

|                   |          |
|-------------------|----------|
| O(6)-C(23)-O(5)   | 124.4(3) |
| O(6)-C(23)-C(24)  | 125.2(3) |
| O(5)-C(23)-C(24)  | 110.3(3) |
| O(9)-C(25)-O(8)   | 123.4(3) |
| O(9)-C(25)-C(26)  | 124.7(3) |
| O(8)-C(25)-C(26)  | 111.8(3) |
| O(11)-C(27)-O(10) | 123.8(3) |
| O(11)-C(27)-C(28) | 125.2(3) |
| O(10)-C(27)-C(28) | 110.9(3) |

---

Symmetry transformations used to generate equivalent atoms:



Table 4. Anisotropic displacement parameters ( $\text{\AA}^2 \times 10^3$ ) for ic22479. The anisotropic displacement factor exponent takes the form:  $-2p^2[h^2 a^* U^{11} + \dots + 2 h k a^* b^* U^{12}]$

|       | U <sup>11</sup> | U <sup>22</sup> | U <sup>33</sup> | U <sup>23</sup> | U <sup>13</sup> | U <sup>12</sup> |
|-------|-----------------|-----------------|-----------------|-----------------|-----------------|-----------------|
| Cl(1) | 58(1)           | 58(1)           | 31(1)           | 7(1)            | 3(1)            | 35(1)           |
| O(1)  | 39(1)           | 33(1)           | 36(1)           | -7(1)           | 2(1)            | 18(1)           |
| O(2)  | 99(2)           | 82(2)           | 86(2)           | -12(2)          | -24(2)          | 73(2)           |
| O(3)  | 58(1)           | 53(1)           | 26(1)           | -1(1)           | 6(1)            | 33(1)           |
| O(4)  | 32(1)           | 43(1)           | 22(1)           | -1(1)           | -2(1)           | 23(1)           |
| O(5)  | 26(1)           | 37(1)           | 30(1)           | -2(1)           | 0(1)            | 17(1)           |
| O(6)  | 44(1)           | 57(1)           | 87(2)           | 9(1)            | 7(1)            | 34(1)           |
| O(7)  | 60(1)           | 32(1)           | 45(1)           | 2(1)            | 19(1)           | 25(1)           |
| O(8)  | 28(1)           | 42(1)           | 28(1)           | -3(1)           | 6(1)            | 14(1)           |
| O(9)  | 54(1)           | 97(2)           | 28(1)           | -11(1)          | -5(1)           | 36(1)           |
| O(10) | 26(1)           | 37(1)           | 29(1)           | -2(1)           | -3(1)           | 18(1)           |
| O(11) | 50(1)           | 56(1)           | 66(2)           | -21(1)          | 0(1)            | 34(1)           |
| O(12) | 92(2)           | 63(2)           | 34(1)           | -17(1)          | -7(1)           | 44(2)           |
| C(1)  | 25(1)           | 31(1)           | 20(1)           | -2(1)           | -1(1)           | 14(1)           |
| C(2)  | 30(1)           | 31(1)           | 26(1)           | -3(1)           | -2(1)           | 16(1)           |
| C(3)  | 31(1)           | 29(1)           | 32(1)           | -1(1)           | 1(1)            | 12(1)           |
| C(4)  | 37(1)           | 31(1)           | 34(1)           | 1(1)            | 2(1)            | 17(1)           |
| C(5)  | 38(1)           | 38(1)           | 34(1)           | 8(1)            | 6(1)            | 15(1)           |
| C(6)  | 37(1)           | 48(2)           | 30(1)           | 6(1)            | 10(1)           | 22(1)           |
| C(7)  | 38(1)           | 44(1)           | 23(1)           | 2(1)            | 6(1)            | 24(1)           |
| C(8)  | 31(1)           | 34(1)           | 24(1)           | 1(1)            | 2(1)            | 19(1)           |
| C(9)  | 26(1)           | 30(1)           | 21(1)           | -1(1)           | 2(1)            | 14(1)           |
| C(10) | 28(1)           | 31(1)           | 19(1)           | -1(1)           | 1(1)            | 16(1)           |
| C(11) | 40(1)           | 29(1)           | 28(1)           | 2(1)            | 10(1)           | 18(1)           |
| C(12) | 40(1)           | 30(1)           | 33(1)           | 2(1)            | 11(1)           | 16(1)           |
| C(13) | 28(1)           | 39(1)           | 22(1)           | 2(1)            | 5(1)            | 16(1)           |
| C(14) | 25(1)           | 34(1)           | 21(1)           | -4(1)           | -2(1)           | 16(1)           |
| C(15) | 28(1)           | 44(1)           | 25(1)           | -2(1)           | -1(1)           | 19(1)           |
| C(16) | 48(2)           | 65(2)           | 50(2)           | -4(2)           | 9(2)            | 11(2)           |
| C(17) | 45(2)           | 40(1)           | 27(1)           | -6(1)           | -4(1)           | 24(1)           |
| C(18) | 48(2)           | 38(2)           | 46(2)           | -7(1)           | -7(1)           | 13(1)           |

|       |       |       |       |        |       |       |
|-------|-------|-------|-------|--------|-------|-------|
| C(19) | 59(2) | 49(2) | 33(2) | -4(1)  | -2(1) | 35(2) |
| C(20) | 62(2) | 50(2) | 40(2) | 15(1)  | 18(1) | 39(2) |
| C(21) | 50(2) | 40(2) | 64(2) | 4(1)   | 13(2) | 28(1) |
| C(22) | 88(3) | 50(2) | 87(3) | -9(2)  | 28(2) | 37(2) |
| C(23) | 33(1) | 54(2) | 29(1) | 4(1)   | 2(1)  | 27(1) |
| C(24) | 32(1) | 67(2) | 46(2) | -3(2)  | -2(1) | 22(1) |
| C(25) | 37(1) | 40(1) | 28(1) | -2(1)  | 6(1)  | 14(1) |
| C(26) | 42(2) | 58(2) | 54(2) | -16(2) | 16(1) | 17(2) |
| C(27) | 32(1) | 36(1) | 47(2) | 5(1)   | 6(1)  | 21(1) |
| C(28) | 37(2) | 63(2) | 61(2) | 15(2)  | 4(1)  | 32(2) |

---

Table 5. Hydrogen coordinates ( $\times 10^4$ ) and isotropic displacement parameters ( $\text{\AA}^2 \times 10^{-3}$ ) for ic22479.

|        | x     | y    | z     | U(eq) |
|--------|-------|------|-------|-------|
| H(4)   | 7452  | 5643 | 1891  | 46    |
| H(2)   | 7719  | 6622 | 4964  | 35    |
| H(3)   | 9176  | 7235 | 5054  | 39    |
| H(4A)  | 8272  | 7024 | 3061  | 41    |
| H(6)   | 9395  | 6810 | 819   | 46    |
| H(7)   | 9120  | 5905 | 2121  | 40    |
| H(9)   | 8327  | 5070 | 4251  | 31    |
| H(10)  | 7408  | 5433 | 4680  | 31    |
| H(12A) | 6721  | 4179 | 7149  | 43    |
| H(12B) | 6534  | 4597 | 6140  | 43    |
| H(13)  | 7398  | 5161 | 8373  | 36    |
| H(14)  | 7521  | 6212 | 7824  | 31    |
| H(15A) | 8997  | 6358 | 6578  | 48    |
| H(15B) | 8483  | 5767 | 7523  | 48    |
| H(15C) | 8646  | 6527 | 7752  | 48    |
| H(16A) | 10017 | 7925 | 3311  | 75    |
| H(16B) | 10177 | 7657 | 1944  | 75    |
| H(17)  | 8086  | 4590 | 2493  | 43    |
| H(18A) | 6810  | 4464 | 1885  | 72    |
| H(18B) | 6980  | 4210 | 3207  | 72    |
| H(18C) | 6971  | 3857 | 1858  | 72    |
| H(20A) | 8440  | 4802 | 6197  | 55    |
| H(20B) | 7830  | 4274 | 7205  | 55    |
| H(22A) | 8628  | 8537 | 7099  | 111   |
| H(22B) | 8167  | 7954 | 8109  | 111   |
| H(22C) | 7848  | 8318 | 7277  | 111   |
| H(24A) | 10494 | 6388 | 4995  | 74    |
| H(24B) | 10116 | 6805 | 5278  | 74    |
| H(24C) | 10344 | 6759 | 3830  | 74    |
| H(26A) | 5686  | 4855 | 10871 | 83    |

|        |      |      |       |    |
|--------|------|------|-------|----|
| H(26B) | 5480 | 4905 | 9406  | 83 |
| H(26C) | 5885 | 5576 | 10261 | 83 |
| H(28A) | 5498 | 5415 | 6657  | 76 |
| H(28B) | 5862 | 5935 | 5489  | 76 |
| H(28C) | 5625 | 6169 | 6753  | 76 |

---
